# Supplementary material for: Lack of long-term acclimation in Antarctic encrusting species suggests vulnerability to warming
Source: PubMed Central journal article supplement (PMC6662708; doi:10.1038/s41467-019-11348-w), 2019-07-29
Supplement: 41467_2019_11348_MOESM1_ESM.pdf [file 41467_2019_11348_MOESM1_ESM.pdf]

## **Supplementary Information**

Lack of long-term acclimation in Antarctic encrusting species suggests  
vulnerability to warming

Clark et al

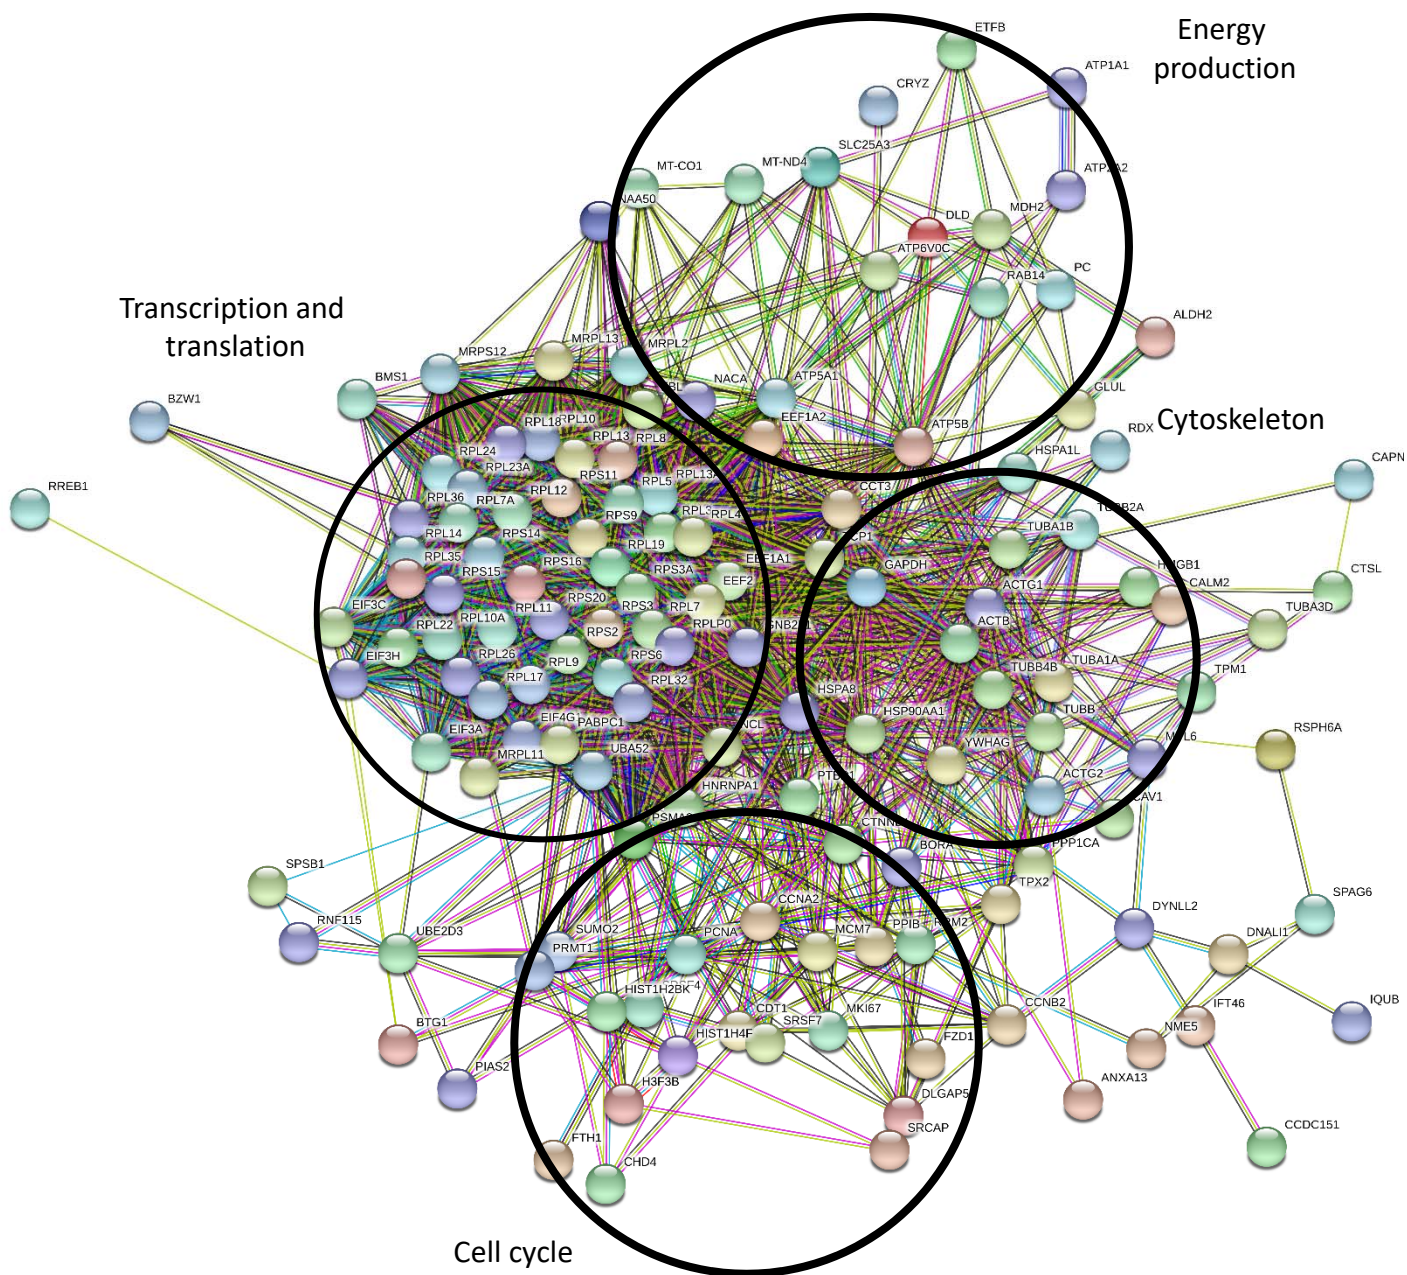

**Supplementary Figure 1: STRING<sup>1,2</sup> output annotated with functional clusters**

**Supplementary Table 1:** Transcriptome assembly and annotation metrics

| <b>Assembly metrics</b>   |               |              |
|---------------------------|---------------|--------------|
| Total trinity genes       | 45,527        |              |
| Total trinity transcripts | 61,421        |              |
| Total bases               | 29,824,840    |              |
| N50                       | 713           |              |
| Contigs in N50            | 9,766         |              |
| Percentage GC             | 44            |              |
| Mean length for contigs   | 486           |              |
| Max contig length         | 49,432        |              |
| <b>Annotation metrics</b> |               |              |
|                           | <b>Unique</b> | <b>Total</b> |
| gene_id                   | 45,527        | 45,527       |
| transcript_id             | 61,421        | 61,421       |
| prot_id                   | 14,658        | 14,658       |
| prot_coords               | 8,266         | 14,658       |
| sprot_Top_BLASTX_hit      | 13,915        | 13,919       |
| sprot_Top_BLASTP_hit      | 9,045         | 9,301        |
| Pfam                      | 7,887         | 8,151        |
| gene_ontology_pfam        | 695           | 4,972        |
| TmHMM                     | 999           | 1,029        |
| SignalP                   | 457           | 521          |

**Supplementary Table 2:** Enriched GO processes in the control versus +2°C transcriptome comparisons. Direction of “down” means that the processes were less represented in controls compared with +2 and thus effectively enriched in +2 compared to control samples.

| <b>GO Biological Process</b>                             |             |                 |               |           |         |       |
|----------------------------------------------------------|-------------|-----------------|---------------|-----------|---------|-------|
|                                                          | No of Genes | Proportion Down | Proportion Up | Direction | P-Value | FDR   |
| GO:0015031<br>PROTEIN_TRANSPORT                          | 10          | 0.60            | 0.00          | Down      | 0.001   | 0.011 |
| GO:0006351<br>TRANSCRIPTION_DNA-TEMPLATED                | 29          | 0.59            | 0.14          | Down      | 0.001   | 0.011 |
| <b>GO Molecular Function</b>                             |             |                 |               |           |         |       |
| GO:0019843<br>RRNA_BINDING                               | 24          | 0.75            | 0.00          | Down      | 0.001   | 0.016 |
| GO:0003899<br>DNA-DIRECTED_5'-3'_RNA_POLYMERASE_ACTIVITY | 22          | 0.73            | 0.09          | Down      | 0.001   | 0.016 |



**Supplementary Table 4:** Blast output from oligotype analyses. Oligotypes with superscript numerals indicate those which matched polar study accessions supported by the associated references in Supplementary references.

| Oligotype       | Accession number of best match | % identity | Description                           |
|-----------------|--------------------------------|------------|---------------------------------------|
| <sup>3</sup> TT | HG941681                       | 100        | Uncultured <i>Granulosicoccus</i> sp  |
| AC              | LC171298                       | 99.8       | Uncultured beta proteobacterium       |
| AA              | EU290343                       | 100        | Uncultured bacterium                  |
| GG              | EU290387                       | 99.3       | Uncultured bacterium                  |
| CT              | JQ218768                       | 99.6       | Uncultured proteobacterium            |
| <sup>4</sup> CG | GU235526                       | 99.1       | Uncultured marine bacterium           |
| CA              | KU647988                       | 98.4       | Uncultured bacterium                  |
| GC              | HG934341                       | 99.1       | Uncultured <i>Leucothrix</i> sp.      |
| TC              | KC462967                       | 99.1       | <i>Shewanella</i> sp.                 |
| CC              | EU290380                       | 96.9       | Uncultured bacterium                  |
| GT              | EF466030                       | 92.1       | Uncultured epsilon proteobacterium    |
| AT              | KJ615748                       | 93.6       | Uncultured bacterium                  |
| GA              | GQ274134                       | 97.8       | Uncultured <i>Bacteroidetes</i>       |
| <sup>5</sup> TA | GQ472830                       | 97.4       | Uncultured <i>Verrucomicrobia</i> sp. |
| AG              | AY527410                       | 98.9       | <i>Saprospira</i> sp.                 |
| TG              | LC171275                       | 96.9       | Uncultured <i>Bacteroidetes</i>       |

## Supplementary references

1. Szklarczyk D, Gable AL, Lyon D, Junge A, Wyder S, Huerta-Cepas J, Simonovic M, Doncheva NT, Morris JH, Bork P, Jensen LJ, von Mering C. STRING v11: protein-protein association networks with increased coverage, supporting functional discovery in genome-wide experimental datasets. *Nucleic Acids Research*, **47**, D607-613 (2019)
2. Szklarczyk D, Morris JH, Cook H, Kuhn M, Wyder S, Simonovic M, Santos A, Doncheva NT, Roth A, Bork P, Jensen LJ, von Mering C. The STRING database in 2017: quality-controlled protein-protein association networks, made broadly accessible. *Nucleic Acids Research*, **45**, D362-68 (2017)
3. Cowie ROM, Williams GJ, Maas EW, Voyles KM, Ryan KG. Antarctic sea-ice microbial communities show distinct patterns of zonation in response to algal-derived substrates. *Aquatic Microbiology and Ecology*, **73**, 123-134 (2014)
4. Grzymalski JJ, Riesenfeld CS, Williams TJ, Dussaq AM, Ducklow H, Erickson M, Cavicchioli R, Murray AE. A metagenomics assessment of winter and summer bacterioplankton from Antarctic Peninsula coastal surface waters. *ISME Journal*, **6**, 1901-1915 (2012)
5. Zeng Y, Zou Y, Grebmeier JM, He J, Zheng T. Culture-independent and -dependent methods to investigate the diversity of planktonic bacteria in the northern Bering Sea. *Polar Biology*, **35**, 117-129 (2012)
